# Supplementary material for: A novel conserved family of Macro-like domains—putative new players in ADP-ribosylation signaling
Source: PubMed Central journal article supplement (PMC6500376; doi:10.7717/peerj.6863), 2019-05-01

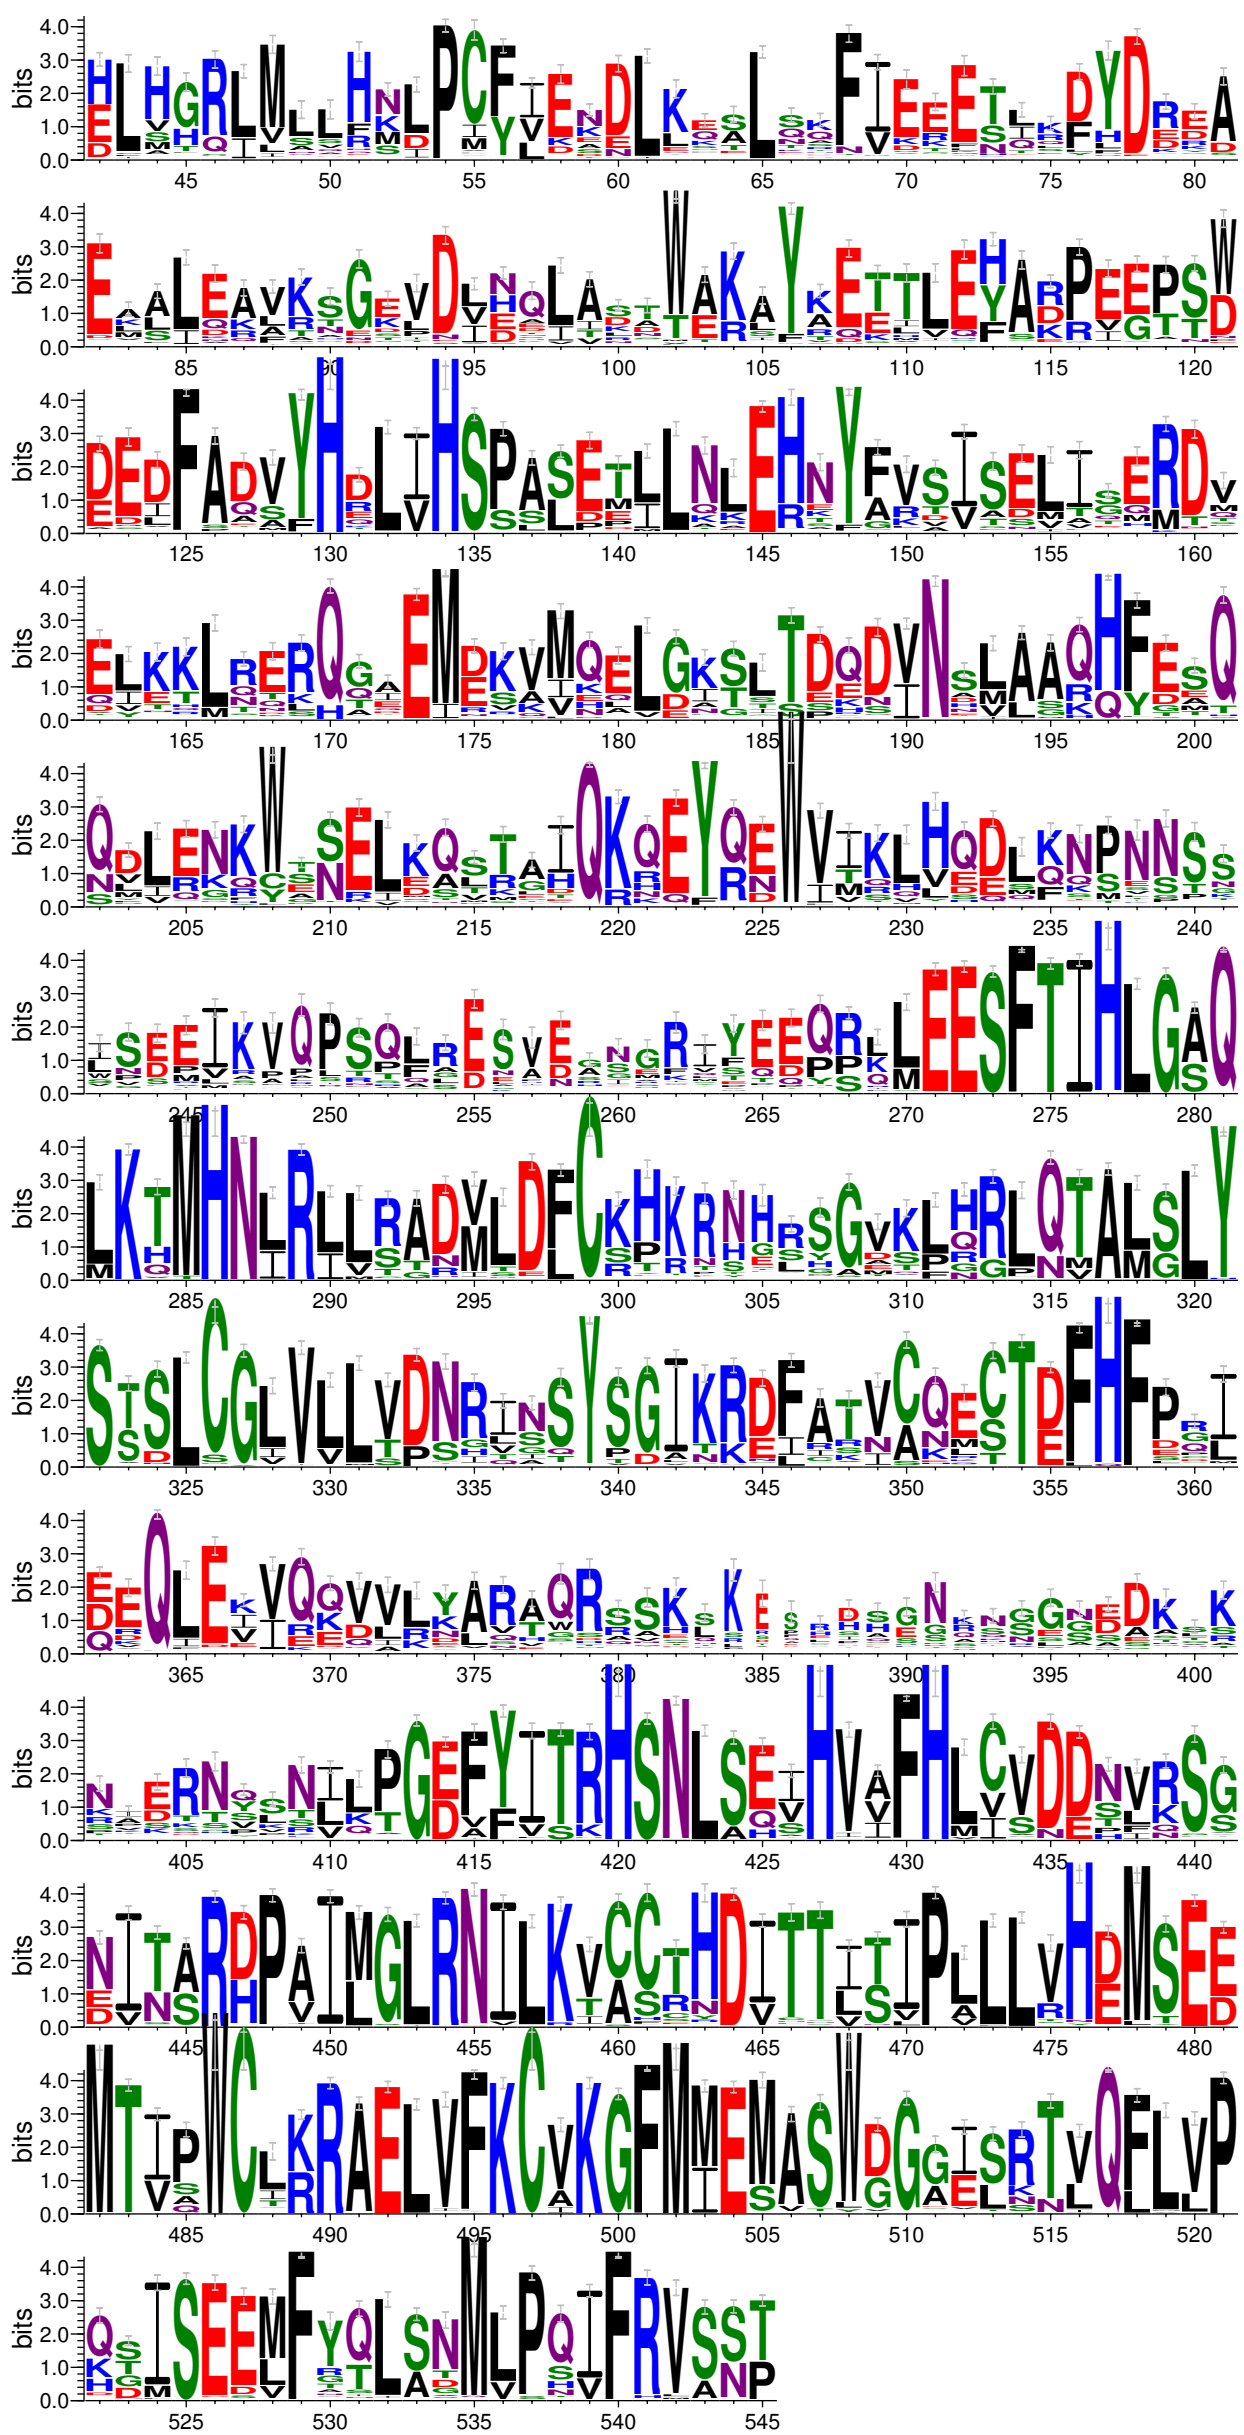

Supplement: peerj-07-6863-s001.pdf [file peerj-07-6863-s001.pdf]
